# Supplementary material
Source: ML conference proceedings conference paper supplement (https://openreview.net/forum?id=RFujq4HoV4)
Supplement: supplementary_material [file attachment]

### Experiment (Query) vs Hypothesis Support

| Query ID   | H1   | H2   | H3   | H4   | H5   | H6   |
|------------|------|------|------|------|------|------|
| 1          | N    | Y    | Y    |      |      |      |
| 2          | Y    | Y    | Y    |      |      |      |
| 3          | Y    | Y    | Y    |      |      |      |
| 4          | Y    | Y    | Y    |      |      |      |
| 5          | Y    | Y    | Y    |      |      |      |
| 6          | N    | Y    | Y    |      |      | 3    |
| 7          | N    | Y    | Y    |      |      | 2    |
| 8          | Y    | Y    | Y    |      |      |      |
| 9          | Y    | Y    | N    |      |      |      |
| 10         | Y    | Y    | Y    |      |      |      |
| 11         | N    | N    | Y    |      |      |      |
| 12         | Y    | N    | N    |      |      | 3    |
| 13         | Y    | Y    | Y    |      |      |      |
| 14         | Y    | Y    | Y    |      |      |      |
| 15         | Y    | Y    | N    |      |      |      |
| 16         | Y    | Y    | Y    |      |      |      |
| 17         | Y    | Y    | Y    |      |      |      |
| 18         | N    | Y    | N    |      |      |      |
| 19         | Y    | Y    | Y    |      |      |      |
| 20         | N    | N    | Y    |      |      | 3    |
| B1         |      |      |      |      |      |      |
| B2         |      |      |      |      |      |      |
| B3         |      |      |      |      |      |      |
| B4         |      |      |      |      |      |      |
| B5         |      |      |      |      |      |      |
| B6         |      |      |      |      |      |      |
| B7         |      |      |      |      |      |      |
| B8         |      |      |      |      |      |      |
| B9         |      |      |      |      |      |      |
| B10        |      |      |      |      |      |      |
| F1         |      |      |      | Y    | Y    |      |
| F2         |      |      |      |      |      | 2    |
| F3         |      |      |      |      |      | 2    |
| F4         |      |      |      | Y    | Y    |      |
| F5         |      |      |      | Y    | Y    |      |
| F6         |      |      |      | Y    | Y    |      |
| F7         |      |      |      | Y    | Y    |      |
| F8         |      |      |      | N    | N    |      |
| F9         |      |      |      | Y    | Y    |      |
| F10        |      |      |      | N    | N    |      |
| F11        |      |      |      | Y    | Y    |      |
| F12        |      |      |      | Y    | Y    |      |
| Supported  | 14   | 17   | 16   | 8    | 8    | 19   |
| Total      | 20   | 20   | 20   | 10   | 10   | 22   |
| Proportion | 0.70 | 0.85 | 0.80 | 0.80 | 0.80 | 0.86 |

## Experiment (Query) vs Hypothesis Support
